# Supplementary material for: Prospective clinical evaluation of deep learning for ultrasonographic screening of abdominal aortic aneurysms
Source: PubMed Central journal article supplement — NPJ Digit Med. 2024 Oct 15;7:282. doi: 10.1038/s41746-024-01269-4 (PMC11480325; doi:10.1038/s41746-024-01269-4), 2024-10-15
Supplement: 41746_2024_1269_MOESM1_ESM.pdf [file 41746_2024_1269_MOESM1_ESM.pdf]

# **Prospective Clinical Evaluation of Deep Learning for Ultrasonographic**

## **Screening of Abdominal Aortic Aneurysms**

I-Min Chiu Tien-Yu Chen, You-Cheng Zheng, Xin-Hong Lin, Fu-Jen Cheng, David

Ouyang\*, Chi-Yung Cheng\*

### **Supplemental information**

**Supplemental Table 1.** DL model performance in internal and external validation.

**Supplemental Figure 1.** Manual labeling of abdominal aorta, spine, and inferior vena cava.

**Supplemental Figure 2.** Real-time bounding box guidance on POCUS

**Supplemental Video 1.** Demo of real-time bounding box guidance displayed on POCUS.

**Supplemental Table 1. DL model performance in internal and external validation.**

|                     | Box Recall | Box Precision | Box mAP IoU $\geq 0.5$ |
|---------------------|------------|---------------|------------------------|
| Internal Validation | 0.987      | 0.921         | 0.973                  |
| External Validation | 0.943      | 0.627         | 0.843                  |

\* mAP: mean average precision

\* IoU: intersection over union threshold

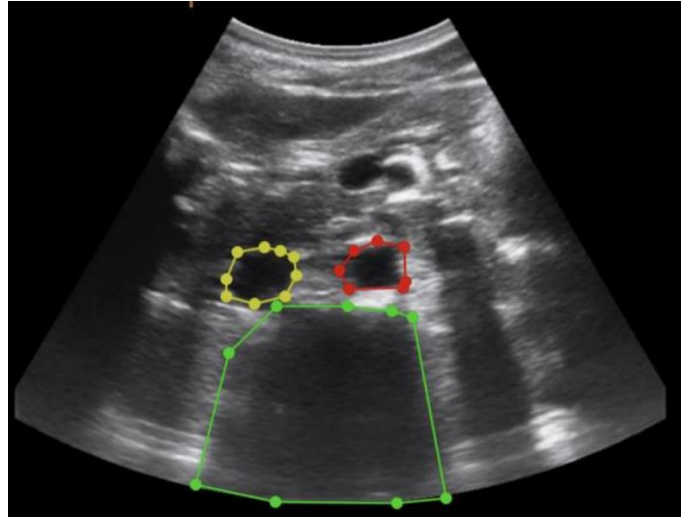

**Supplemental Figure 1. Manual labeling of abdominal aorta, spine, and inferior vena cava.** An example of manual label over abdominal aorta (red), spine (green), and inferior vena cava (yellow) during data preparation of model training.

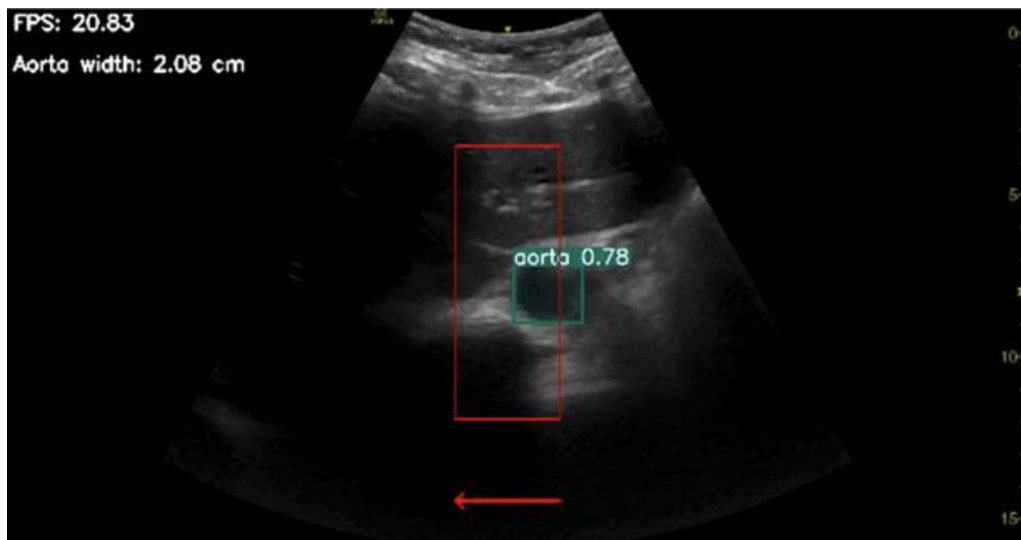

**Supplemental Figure 2. Real-time bounding box guidance on POCUS.** User interface of deep learning guidance for image acquisition
